# Supplementary material
Source: MDPI journal article supplement (https://www.mdpi.com/1424-2818/15/2/257)
Supplement: s1 [file s1]

# Title

Pelagial zooplankton community in a newly established reservoir during and after the impoundment of a hydropower dam.

**Georgia Stamou**<sup>1</sup>, **Maria Demertzioglou**<sup>1</sup>, **Matina Katsiapi**<sup>2,3</sup>, **Dimitra Voutsas**<sup>4</sup>, **Argyri Kozari**<sup>4</sup>, **Ioanna Pantelaki**<sup>4</sup>, **Maria Moustaka-Gouni**<sup>2</sup> and **Evangelia Michaloudi**<sup>1,\*</sup>

<sup>1</sup> Department of Zoology, School of Biology, Aristotle University of Thessaloniki, 54124 Thessaloniki, Greece; gstamouc@bio.auth.gr (G.S.); marideme@bio.auth.gr; (M.D.)

<sup>2</sup> Department of Botany, School of Biology, Aristotle University of Thessaloniki, 54124, Thessaloniki, Greece; mmustaka@bio.auth.gr (M.M-G)

<sup>3</sup> EYATH SA, Water Supply Division/Drinking Water Treatment Facility, Nea Ionia, 57008, Thessaloniki, Greece; matinakatsiapi@gmail.com

<sup>4</sup> Environmental Pollution Control Laboratory, School of Chemistry, Aristotle University of Thessaloniki, 54124, Thessaloniki, Greece; dvoutsas@chem.auth.gr

\* Correspondence: tholi@bio.auth.gr

Table S1. Results of SIMPER analysis applied on Bray-Curtis similarity matrix of zooplankton presence/absence data concerning the similarity of groups

|         | Average similarity | Most contributing taxa to similarity   | Contribution up to 20% |
|---------|--------------------|----------------------------------------|------------------------|
| Group A | 67.39              | <i>Asplanchna priodonta</i>            | 5.78                   |
|         |                    | Bdelloidea                             | 5.78                   |
|         |                    | <i>Keratella cochlearis</i>            | 5.78                   |
|         |                    | <i>Keratella tecta</i>                 | 5.78                   |
| Group B |                    | less than 2 samples in the group       |                        |
| Group C | 62.92              | <i>Bosmina longirostris</i>            | 6.21                   |
|         |                    | <i>Daphnia cucullata</i>               | 6.21                   |
|         |                    | <i>Eudiaptomus padanus etruscus</i>    | 6.21                   |
|         |                    | <i>Mesocyclops leuckarti leuckarti</i> | 6.21                   |
| Group D | 67.97              | <i>Filinia terminalis</i>              | 7.06                   |
|         |                    | <i>Kellicottia longispina</i>          | 7.06                   |
|         |                    | <i>Polyarthra luminosa</i>             | 7.06                   |
| Group E | 60.59              | <i>Kellicottia longispina</i>          | 9.63                   |
|         |                    | <i>Keratella cochlearis</i>            | 9.63                   |
|         |                    | <i>Polyarthra major</i>                | 9.63                   |

Table S2. Results of SIMPER analysis applied on Bray-Curtis similarity matrix of presence/absence data concerning the dissimilarity of groups

|           | Average dissimilarity | Most contributing taxa to dissimilarity | Contribution up to 20% |
|-----------|-----------------------|-----------------------------------------|------------------------|
| Group A-B | 52.98                 | <i>Dicranophoroides caudatus</i>        | 4.14                   |
|           |                       | <i>Keratella tecta</i>                  | 4.14                   |
|           |                       | <i>Lecane closterocerca</i>             | 4.14                   |
|           |                       | <i>Lepadella rhomboides</i>             | 4.14                   |
|           |                       | <i>Notholca squamula</i>                | 4.14                   |
| Group A-C | 49.12                 | <i>Mesocyclops leuckarti leuckarti</i>  | 3.98                   |
|           |                       | <i>Cyclops abyssorum</i> group          | 3.58                   |
|           |                       | <i>Lepadella rhomboides</i>             | 3.55                   |
|           |                       | <i>Hexarthra mira</i>                   | 2.93                   |
|           |                       | <i>Lecane hamata</i>                    | 2.9                    |
|           |                       | <i>Keratella quadrata</i>               | 2.7                    |
|           |                       | <i>Filinia terminalis</i>               | 3.73                   |
| Group A-D | 57.68                 | <i>Kellicottia longispina</i>           | 3.73                   |
|           |                       | <i>Lecane closterocerca</i>             | 3.73                   |
|           |                       | <i>Ceriodaphnia reticulata</i>          | 3.73                   |
|           |                       | <i>Conochilus unicornis</i>             | 3.31                   |
|           |                       | <i>Mesocyclops leuckarti leuckarti</i>  | 3.26                   |
|           |                       | <i>Kellicottia longispina</i>           | 3.66                   |
|           |                       | <i>Lecane closterocerca</i>             | 3.66                   |
| Group A-E | 63.89                 | <i>Pompholyx complanata</i>             | 3.66                   |
|           |                       | <i>Ceriodaphnia reticulata</i>          | 3.66                   |
|           |                       | <i>Chydorus spaericus</i>               | 3.66                   |
|           |                       | <i>Daphnia pulicaria</i>                | 3.66                   |
|           |                       | <i>Brachionus angularis</i>             | 4.64                   |
|           |                       | <i>Dicranophoroides caudatus</i>        | 4.64                   |
|           |                       | <i>Notholca squamula</i>                | 4.64                   |
| Group B-C | 47.32                 | Ostracoda                               | 4.64                   |
|           |                       | <i>Ceriodaphnia reticulata</i>          | 4.25                   |
|           |                       | <i>Brachionus angularis</i>             | 4.42                   |
|           |                       | <i>Cephalodella gibba</i>               | 4.42                   |
|           |                       | <i>Dicranophoroides caudatus</i>        | 4.42                   |
|           |                       | <i>Filinia terminalis</i>               | 4.42                   |
|           |                       | <i>Kellicottia longispina</i>           | 4.42                   |
| Group B-D | 55.42                 | <i>Kellicottia longispina</i>           | 4.98                   |
|           |                       | <i>Lophocharis salpina</i>              | 4.98                   |
|           |                       | <i>Polyarthra major</i>                 | 4.98                   |
|           |                       | <i>Synchaeta</i> spp.                   | 4.98                   |
|           |                       | <i>Chydorus spaericus</i>               | 4.98                   |
|           |                       | <i>Ceriodaphnia reticulata</i>          | 4.19                   |
| Group B-E | 54.05                 | <i>Cyclops abyssorum</i> group          | 4.11                   |
|           |                       | <i>Lepadella rhomboides</i>             | 4.08                   |
|           |                       | <i>Polyarthra dolicoptera</i>           | 3.52                   |
|           |                       | <i>Kellicottia longispina</i>           | 3.32                   |
|           |                       | <i>Lecane flexilis</i>                  | 3.05                   |
|           |                       | <i>Polyarthra major</i>                 | 3.49                   |
|           |                       | <i>Ceriodaphnia reticulata</i>          | 3.49                   |
| Group C-D | 47.14                 | <i>Cyclops abyssorum</i> group          | 3.43                   |
|           |                       | <i>Polyarthra luminosa</i>              | 3.07                   |
|           |                       | <i>Filinia longiseta</i>                | 3.06                   |
|           |                       | <i>Pompholyx complanata</i>             | 3.05                   |
|           |                       | <i>Acanthocyclops robustus</i> group    | 2.89                   |
|           |                       | <i>Polyarthra luminosa</i>              | 5.43                   |
|           |                       | <i>Pompholyx complanata</i>             | 5.43                   |
| Group C-E | 61.53                 | <i>Polyarthra major</i>                 | 4.81                   |
|           |                       | <i>Acanthocyclops robustus</i> group    | 3.68                   |
|           |                       | <i>Brachionus angularis</i>             | 3.19                   |
|           |                       |                                         |                        |
| Group D-E | 48.58                 |                                         |                        |
|           |                       |                                         |                        |
|           |                       |                                         |                        |
|           |                       |                                         |                        |
|           |                       |                                         |                        |

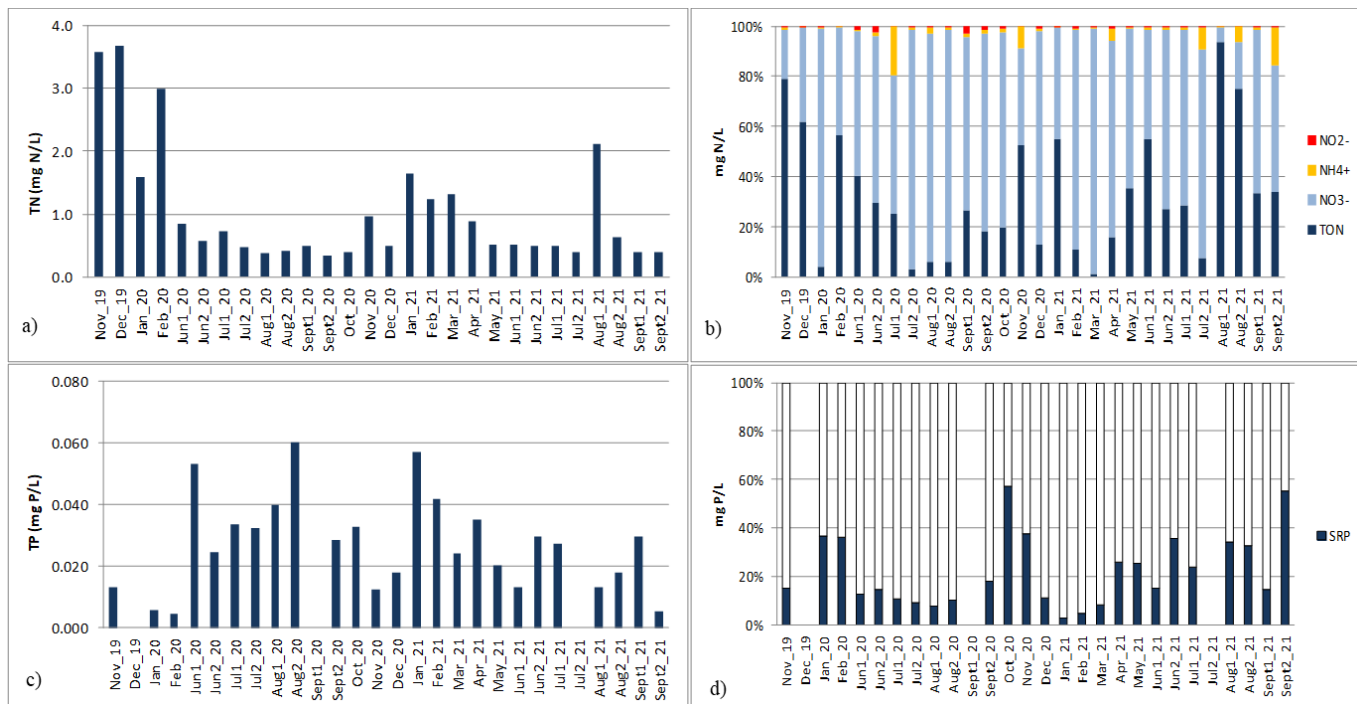

Figure S1. **a)** Concentration of total nitrogen (mg N/L) and **b)** relative contribution of nitrogen species (%), **c)** concentration of total phosphorus (mg P/L) and **d)** relative contribution of soluble reactive phosphorus (%) to TP in Moglicë Reservoir during November 2019- September 2021.
